# Supplementary material
Source: PubMed Central journal article supplement (PMC9106770)
Supplement: 12264_2022_819_MOESM1_ESM.pdf [file 12264_2022_819_MOESM1_ESM.pdf]

## Supplementary Materials

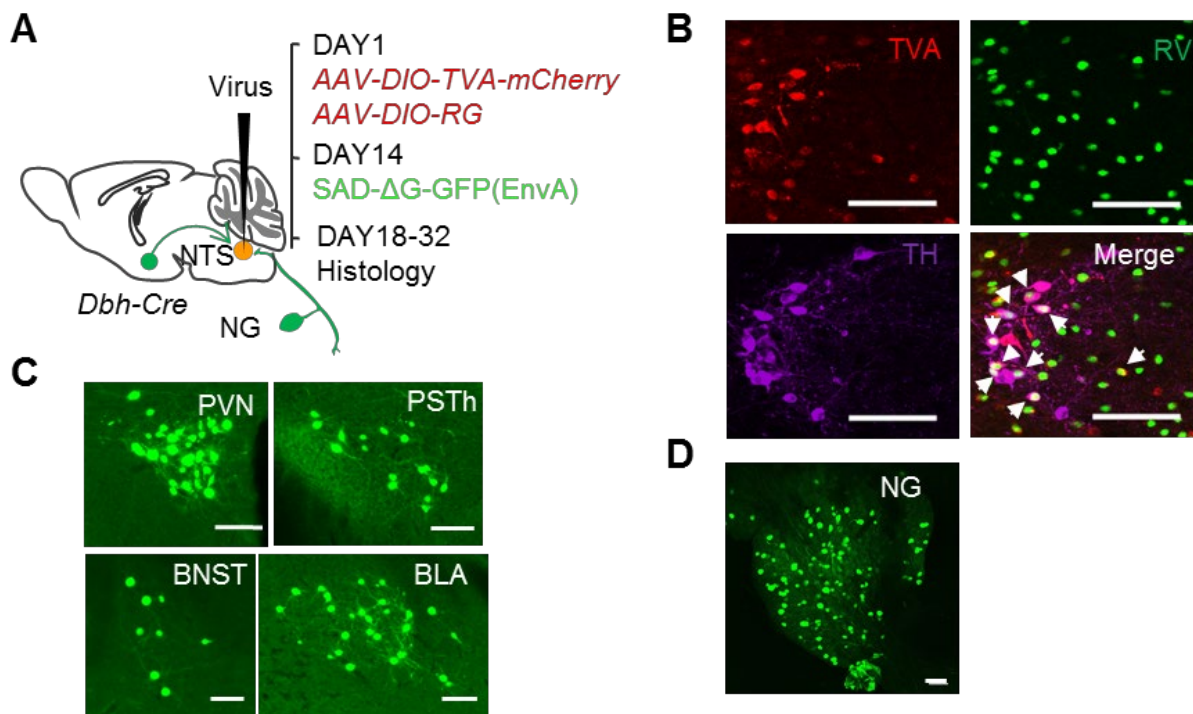

**Fig. S1** RV-based retrograde trans-synaptic tracing of CA<sup>NTS</sup> neurons. **A** Experimental design of genetically modified RV-based tracing. **B** Selective expression of TVA in CA<sup>NTS</sup> neurons [arrows, starter cells (*i.e.* TVA<sup>+</sup>RV<sup>+</sup> neurons); scale bars here and below, 100  $\mu$ m]. **C** Representative images showing labeled neurons presynaptic to CA<sup>NTS</sup> neurons in the PVN, BNST, PSTh, and BLA. **D** Representative image of trans-synaptically infected neurons in the NG.

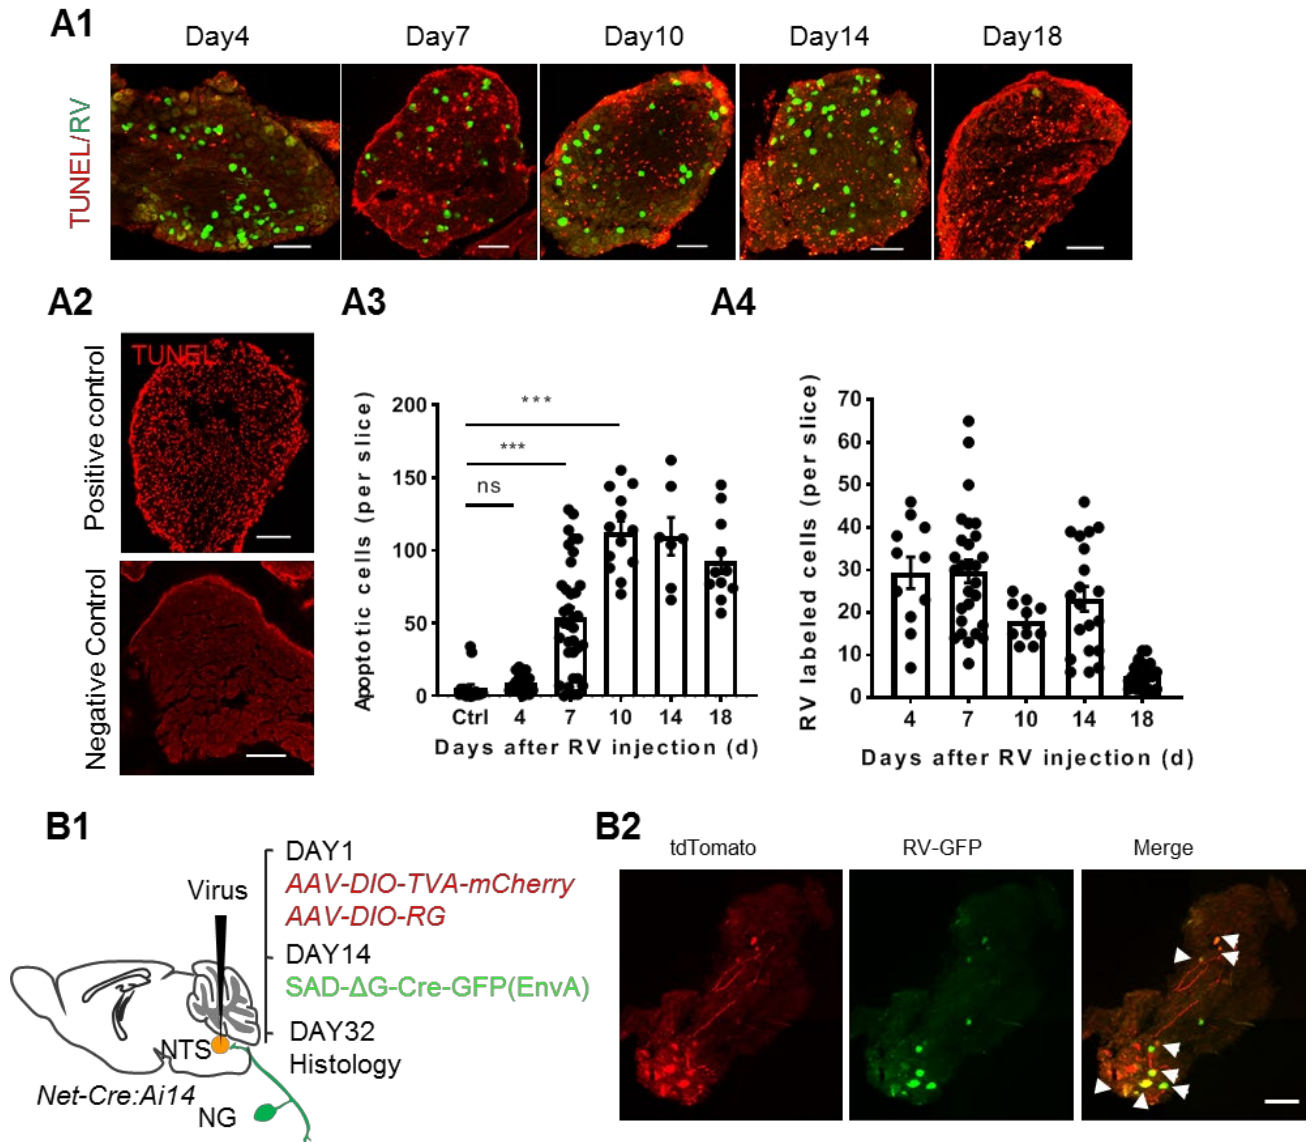

**Fig. S2** Apoptosis in nodose ganglia after RV infection. **A1** Representative images showing apoptosis in nodose ganglia from day 4 to day 18 after RV injection (green). Apoptotic cells (red) were detected using the TUNEL assay (scale bars and below, 100  $\mu$ m). **A2** Upper panel, nodose ganglia treated with an endonuclease DNase for 5 h as positive control; lower panel, nodose ganglia treated with PBS as negative control. **A3**, **A4** Numbers of apoptotic cells (**A3**) and RV-labeled neurons (**A4**) in nodose ganglia on days 4, 7, 10, 14, and 18 after RV injection. Each symbol represents an NG slice (in **A3**, n = 18 on day 4, 35 on day 7, 13 on day 10, 7 on day 14, 11 on day 18, and 17 in the negative control group; in **A4**, n = 11 on day 4, 28 on day 7, 10 on day 10, 20 on day 14, and 24 on day 18). mean  $\pm$

s.e.m., Student's *t* test.. **B1, B2** RV trans-synaptically-labeled NG neurons in *Net: Ai14* mice. **B1** Experimental design. **B2** Representative images showing tdTomato+ and GFP double-labeled NG neurons (arrows) in *Net-Cre: Ai14* mice on day 18 after RV infection. n = 248 RV-GFP neurons and 294 tdTomato+ neurons in 40 slices from two *Net-Ai14* mice.

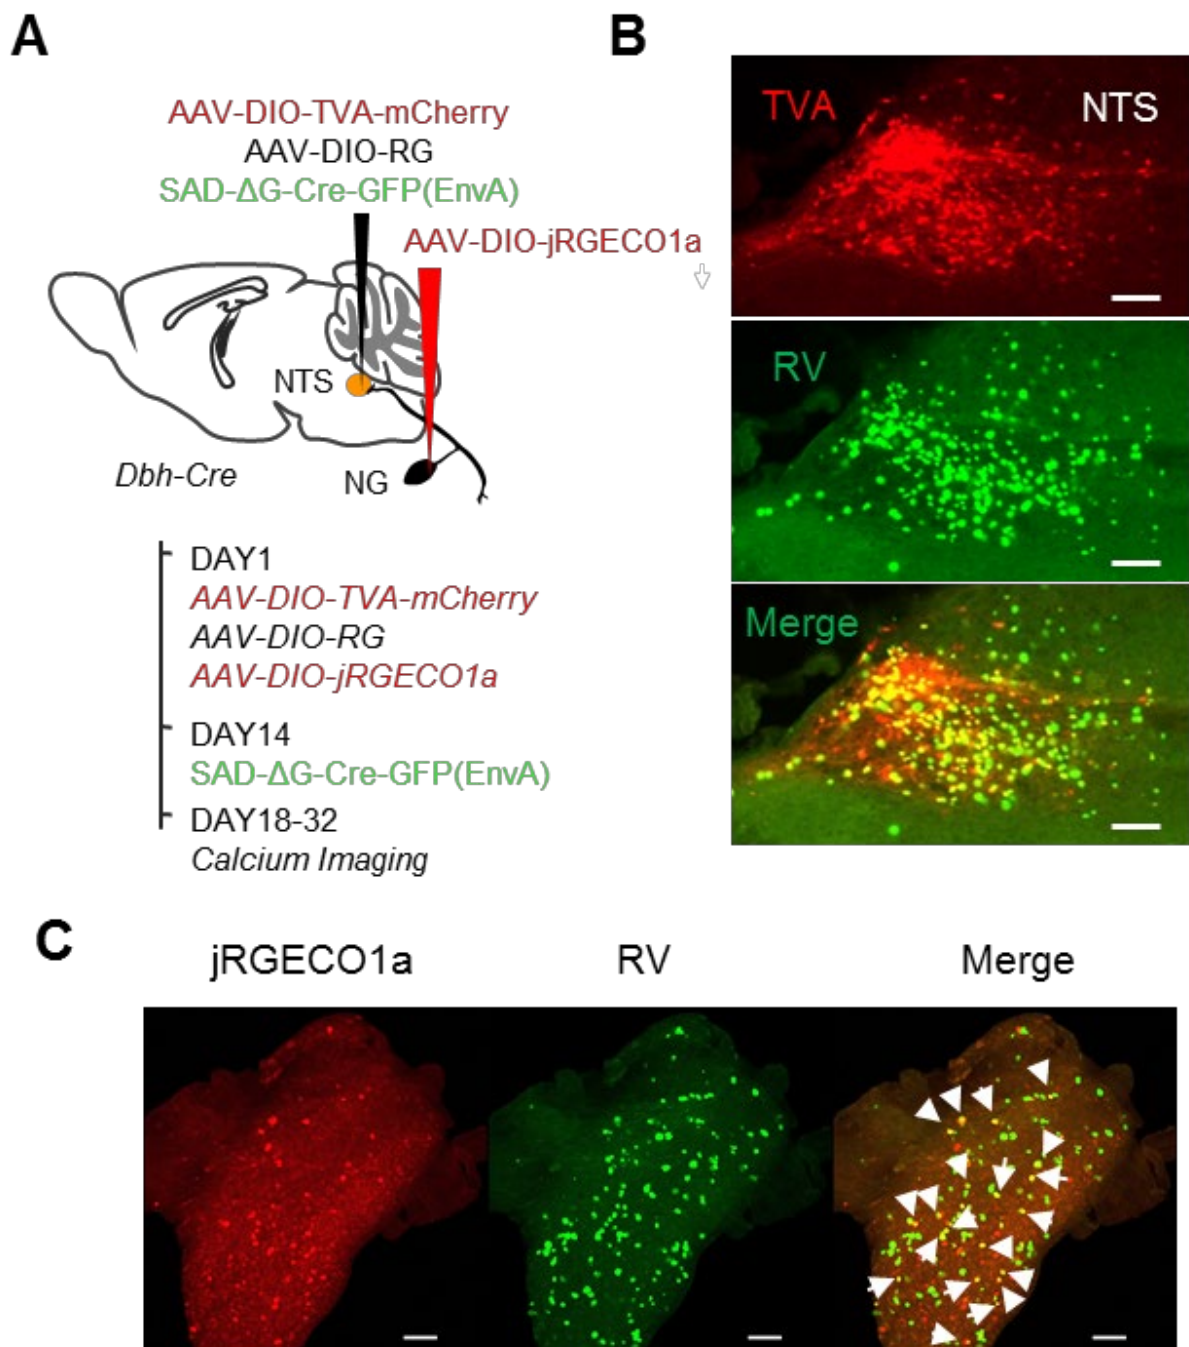

**Fig. S3** Selective expression of a fluorescent  $\text{Ca}^{2+}$  probe in NG neurons that project to  $\text{CA}^{\text{NTS}}$  neurons.

**A** Experimental strategy of selective expression of JRGECO1a in  $\text{CA}^{\text{NTS}}$  neuron-projecting NG neurons. **B** Injection site in the NTS.  $\text{RV}^+\text{TVA}^+$  double-labeled neurons are starter cells (scale bars, 100  $\mu\text{m}$ ). **C** Representative images showing the co-localization of JRGECO1a and RV-infected neurons in nodose ganglia on day 10 after RV injection (arrows, double-labeled neurons; scale bars, 100  $\mu\text{m}$ ).

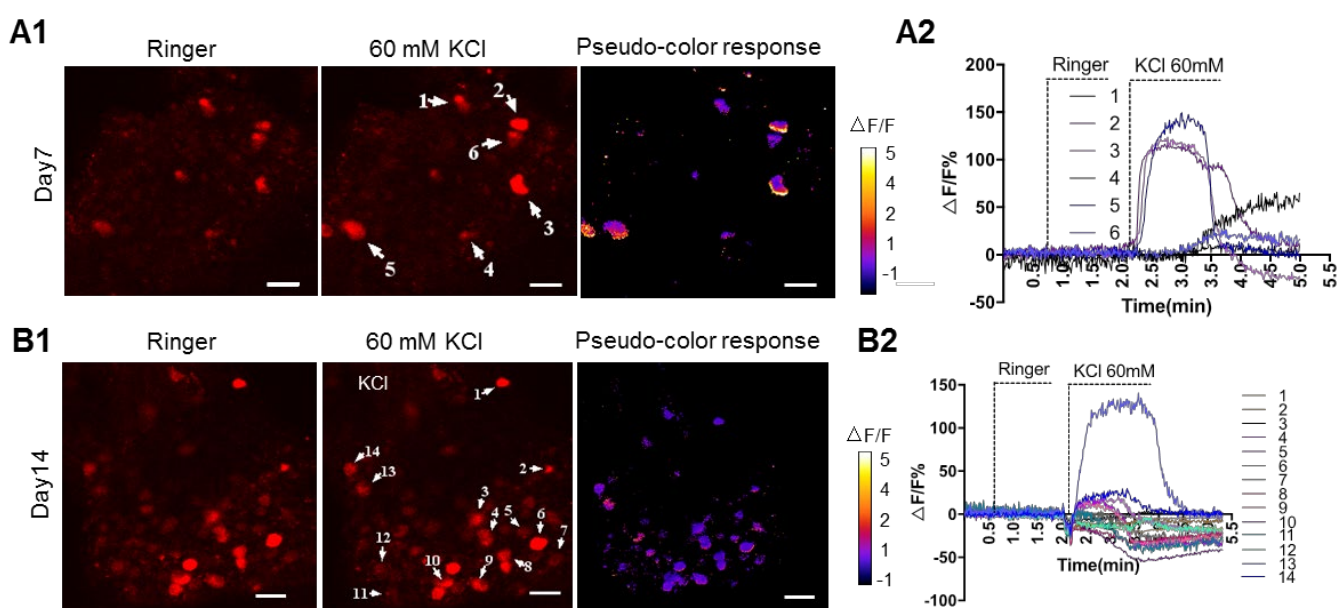

**Fig. S4** Viability of trans-synaptically-infected NG neurons. Representative images and tracers showing fluorescence responses to perfusion with Ringer's solution and 60 mM KCl in JRGECO1a-expressing NG neurons on day 7 (**A1**, **A2**) and day 14 (**B1**, **B2**) after RV infection. Left panels, representative images and corresponding fluorescence changes; right panels traces of fluorescence changes measured in indicated neurons (scale bars, 50  $\mu\text{m}$ ).

**Table S1** Summary of Ca<sup>2+</sup> imaging results

| Day after RV injection               | positive control-GLP1R | Day4                  | Day7                  | Day10                | Day14              | Day18 |
|--------------------------------------|------------------------|-----------------------|-----------------------|----------------------|--------------------|-------|
| Responsive cells /jRGECO1a+          | 33/35                  | 39/44                 | 36/49                 | 10/15                | 37/72              | 0/5   |
| $\Delta F/F\%$<br>(mean $\pm$ s.e.m) | 194.44<br>$\pm 19.28$  | 164.67<br>$\pm 18.77$ | 144.58<br>$\pm 24.10$ | 92.64<br>$\pm 24.69$ | 35.29<br>$\pm 5.2$ | 0     |
